# Supplementary material for: Serum Uric Acid to Creatinine Ratio and Risk of Metabolic Syndrome in Saudi Type 2 Diabetic Patients
Source: PubMed Central journal article supplement (PMC5608718; doi:10.1038/s41598-017-12085-0), 2017-09-21

## Serum Uric Acid to Creatinine Ratio and Risk of Metabolic Syndrome in Saudi Type 2 Diabetic Patients

Nasser M Al-Daghri, Omar S. Al-Attas, Kaiser Wani, Shaun Sabico, Majed S. Alokail

**Supplementary table 1(a):** Adjusted Odds ratio (95% confidence interval) for metabolic syndrome and its components in Serum UA/Cr tertiles in males.

|                             |            | OR (95% CI)      |                   |       | p value (trend) |
|-----------------------------|------------|------------------|-------------------|-------|-----------------|
| Serum UA/Cr                 | Tertile 1  | Tertile 2        | Tertile 3         |       |                 |
| N                           | 2.1 to 3.4 | 3.5 to 4.5       | 4.6 to 9.7        |       |                 |
|                             | 45         | 45               | 45                |       |                 |
| <b>Central Obesity</b>      |            |                  |                   |       |                 |
| Model a                     | Reference  | 3.12 (0.8 - 5.4) | 5.54 (1.5 - 10.1) | 0.028 |                 |
| Model b                     | Reference  | 3.09 (0.8 - 5.4) | 5.26 (1.4 - 10.2) | 0.081 |                 |
| Model c                     | Reference  | 2.07 (0.4 - 5.1) | 2.37 (0.6 - 9.5)  | 0.008 |                 |
| Model d                     | Reference  | 2.19 (0.4 - 5.3) | 2.68 (0.6 - 10.0) | 0.007 |                 |
| <b>Hypertriglyceridemia</b> |            |                  |                   |       |                 |
| Model a                     | Reference  | 1.11 (0.4 - 2.7) | 1.60 (0.7 - 3.8)  | 0.547 |                 |
| Model b                     | Reference  | 1.11 (0.4 - 2.7) | 1.57 (0.6 - 3.8)  | 0.772 |                 |
| Model c                     | Reference  | 1.13 (0.4 - 2.6) | 1.48 (0.5 - 3.7)  | 0.017 |                 |
| Model d                     | Reference  | 1.08 (0.4 - 2.9) | 1.49 (0.6 - 3.9)  | 0.027 |                 |
| <b>Low HDL-Cholesterol</b>  |            |                  |                   |       |                 |
| Model a                     | Reference  | 1.21 (0.5 - 2.8) | 1.83 (0.8 - 4.2)  | 0.361 |                 |
| Model b                     | Reference  | 1.19 (0.5 - 2.8) | 1.77 (0.7 - 4.1)  | 0.651 |                 |
| Model c                     | Reference  | 1.05 (0.4 - 2.5) | 1.34 (0.5 - 3.3)  | 0.021 |                 |
| Model d                     | Reference  | 1.21 (0.5 - 3.1) | 1.32 (0.5 - 3.4)  | 0.027 |                 |
| <b>Hypertension</b>         |            |                  |                   |       |                 |
| Model a                     | Reference  | 0.62 (0.2 - 1.4) | 0.79 (0.3 - 1.8)  | 0.555 |                 |
| Model b                     | Reference  | 0.84 (0.4 - 1.9) | 1.21 (0.7 - 2.3)  | 0.024 |                 |
| Model c                     | Reference  | 0.86 (0.5 - 1.6) | 1.16 (0.7 - 1.9)  | 0.026 |                 |
| Model d                     | Reference  | 0.79 (0.4 - 1.3) | 1.11 (0.5 - 1.9)  | 0.027 |                 |
| <b>MetS</b>                 |            |                  |                   |       |                 |
| Model a                     | Reference  | 1.33 (0.6 - 3.1) | 1.39 (0.6 - 3.2)  | 0.004 |                 |
| Model b                     | Reference  | 1.32 (0.6 - 3.1) | 1.37 (0.6 - 3.2)  | 0.042 |                 |
| Model c                     | Reference  | 1.21 (0.5 - 2.8) | 1.32 (0.7 - 3.1)  | 0.026 |                 |

**Supplementary table 1(b):** Adjusted Odds ratio (95% confidence interval) for metabolic syndrome and its components in Serum UA/Cr tertiles in females.

| Serum UA/Cr                 | Tertile 1<br>2.4 to 4.3<br>N 66 | OR (95% CI)                   |                                | p value<br>(trend) |
|-----------------------------|---------------------------------|-------------------------------|--------------------------------|--------------------|
|                             |                                 | Tertile 2<br>4.4 to 5.5<br>66 | Tertile 3<br>5.6 to 11.1<br>65 |                    |
| <b>Central Obesity</b>      |                                 |                               |                                |                    |
| Model a                     | Reference                       | 2.09 (1.0 - 4.5)              | 2.29 (1.1 - 5.0)               | <0.001             |
| Model b                     | Reference                       | 2.15 (0.9 - 4.7)              | 2.29 (1.0 - 5.0)               | <0.001             |
| Model c                     | Reference                       | 2.08 (0.9 - 4.8)              | 2.62 (1.1 - 6.1)               | <0.001             |
| Model d                     | Reference                       | 2.08 (0.9 - 4.9)              | 2.86 (1.2 - 6.8)               | <0.001             |
| <b>Hypertriglyceridemia</b> |                                 |                               |                                |                    |
| Model a                     | Reference                       | 1.17 (0.5 - 2.5)              | 1.55 (0.7 - 3.3)               | 0.506              |
| Model b                     | Reference                       | 1.13 (0.5 - 2.4)              | 1.55 (0.7 - 3.2)               | 0.021              |
| Model c                     | Reference                       | 1.18 (0.5 - 2.6)              | 1.56 (0.7 - 3.3)               | <0.001             |
| Model d                     | Reference                       | 1.45 (0.6 - 3.4)              | 2.32 (1.0 - 5.4)               | <0.001             |
| <b>Low HDL-Cholesterol</b>  |                                 |                               |                                |                    |
| Model a                     | Reference                       | 0.94 (0.5 - 1.9)              | 1.64 (0.8 - 3.4)               | 0.103              |
| Model b                     | Reference                       | 1.01 (0.5 - 1.9)              | 1.63 (0.7 - 3.4)               | 0.012              |
| Model c                     | Reference                       | 1.05 (0.7 - 2.1)              | 1.57 (0.7 - 3.3)               | <0.001             |
| Model d                     | Reference                       | 1.41 (0.6 - 3.1)              | 1.95 (0.5 - 2.2)               | <0.001             |
| <b>Hypertension</b>         |                                 |                               |                                |                    |
| Model a                     | Reference                       | 1.56 (0.7 - 3.1)              | 1.66 (0.8 - 3.3)               | 0.301              |
| Model b                     | Reference                       | 1.68 (0.8 - 3.4)              | 1.67 (0.8 - 3.4)               | 0.081              |
| Model c                     | Reference                       | 1.64 (0.8 - 3.4)              | 1.85 (0.9 - 3.8)               | 0.029              |
| Model d                     | Reference                       | 1.92 (0.8 - 4.2)              | 2.15 (0.9 - 4.5)               | 0.004              |
| <b>MetS</b>                 |                                 |                               |                                |                    |
| Model a                     | Reference                       | 2.64 (1.1 - 6.1)              | 3.42 (1.4 - 8.1)               | 0.009              |
| Model b                     | Reference                       | 2.57 (1.1 - 5.8)              | 3.47 (1.5 - 8.3)               | 0.004              |
| Model c                     | Reference                       | 2.64 (1.1 - 5.9)              | 3.89 (1.6 - 9.1)               | 0.008              |

**Note for supplementary table 1(a) and 1(b):** Significance was set at  $p < 0.05$ . Model 'a' is unadjusted (univariate). Each Model is adjusted for same set of variables in the previous model plus age (continuous), BMI (continuous) and other components of MetS as present/absent in models 'b', 'c', and 'd' respectively.

**Supplementary figure 1:** Odds ratio (OR) of MetS and its components in individuals with higher SrUa/Cr tertiles compared to lowest one (Separately done for males and females). The dotted line shows reference (lowest UA/Cr tertile).

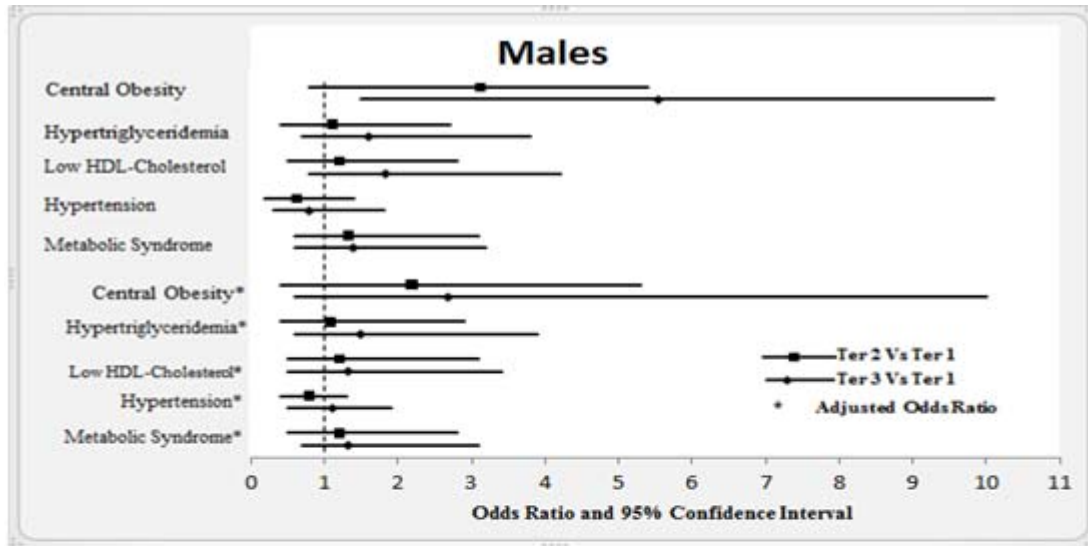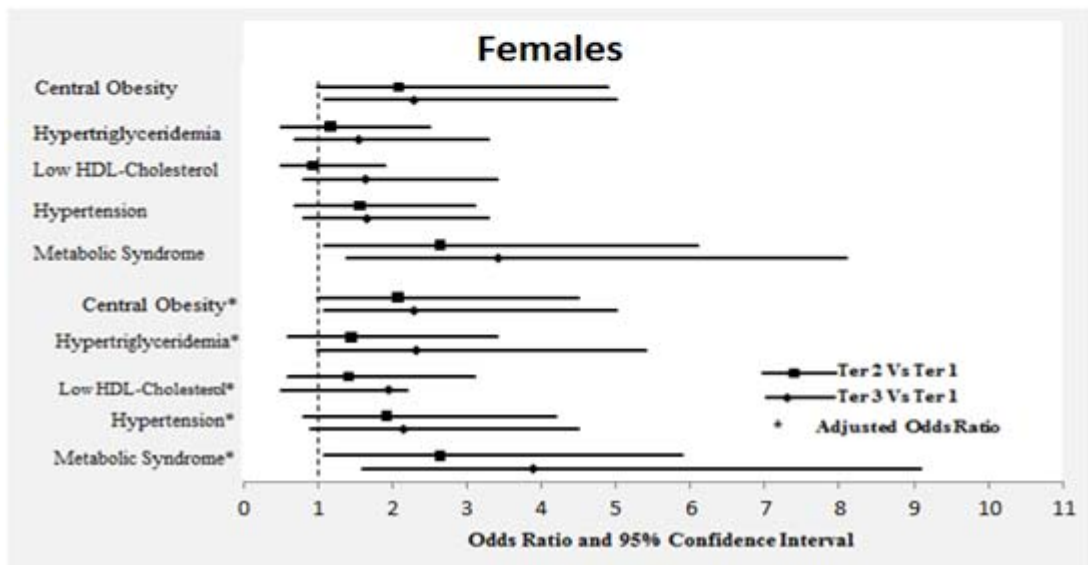

Supplement: 41598_2017_12085_MOESM1_ESM.pdf [file 41598_2017_12085_MOESM1_ESM.pdf]
